# Supplementary material for: Assessing Fear of Progression, Stigma, and Psychological Detachment in Hemodialysis Patients: A Structural Equation Modeling Study
Source: Research Square preprint supplement (doi:10.21203/rs.3.rs-7545852/v1), 2025-10-10
Supplement: Supplementary file 1 [file 2fa49152443276686be18968.docx]

# Psychological Detachment Questionnaire

Dear Sir/Madam,

We send you our best wishes!

We are currently conducting a study titled "Psychological Detachment in Maintenance Hemodialysis (MHD) Patients". A large-sample survey is now required to explore the influencing factors of psychological detachment in MHD patients. The results will provide a basis for reducing the negative experiences caused by hemodialysis, safeguarding patients’ mental health, and improving their psychological detachment level and quality of life. We sincerely invite you to participate in this questionnaire survey!

This questionnaire may take 20-30 minutes to complete. Please arrange your time appropriately. Thank you for filling out this questionnaire amid your busy schedule! If you have any questions during the process, please feel free to contact us (Contact Person: Liu Cong; Email: 429885794@qq.com).

1. Since you started hemodialysis, have you had cardiovascular and cerebrovascular disease complications? [Single choice] *

- Always
- Often
- Rarely
- Occasionally
- Never

1. Do you frequently experience infection issues (such as colds, lung infections)? [Single choice] *

- Always
- Often
- Rarely
- Occasionally
- Never

1. During the interdialysis interval, can you control your blood pressure within the standard range? [Single choice] *

- Completely unable to
- Often unable to
- Sometimes unable to
- Mostly able to
- Always able to

1. During the interdialysis interval, do you feel fatigued? [Single choice] *

- Always
- Often
- Sometimes
- Seldom
- Never

1. How would you rate your sleep quality at night? [Single choice] *

- Very poor
- Poor
- Average
- Good
- Very good

1. Do you exercise regularly every week? [Single choice] *

- Never
- Seldom
- Sometimes
- Often
- Always

1. Are you troubled by dry and itchy skin? [Single choice] *

- Always
- Often
- Sometimes
- Seldom
- Never

1. How would you rate your usual appetite? [Single choice] *

- Very poor
- Poor
- Average
- Good
- Very good

1. During the interdialysis interval, can you control your weight gain within the standard range? [Single choice] *

- Completely unable to
- Often unable to
- Sometimes able to
- Mostly able to
- Always able to

1. Do you know how to properly relieve thirst? [Single choice] *

- Completely don’t know
- Slightly familiar (but not proficient)
- Familiar but sometimes unable to do so
- Relatively familiar and basically able to do so
- Very familiar and always able to do so

1. Can you reasonably allocate your daily sodium intake? [Single choice] *

- Completely unable to
- Seldom able to
- Sometimes able to
- Often able to
- Completely able to

1. Do you consume a sufficient amount of high-quality protein every day? [Single choice] *

- Completely unaware (of the requirement)
- Know a little
- Know but sometimes unable to do so
- Relatively clear and basically able to do so
- Very clear and always able to do so

1. Does your vascular access affect your daily life? [Single choice] *

- Extremely large impact
- Relatively large impact
- Average impact
- Relatively small impact
- No impact

1. Can you take medications on time and in the correct dosage? [Single choice] *

- Completely unable to
- Seldom able to
- Sometimes unable to
- Often able to
- Always able to

1. In the past three months, have you ever ended your hemodialysis treatment early? [Single choice] *

- Always end early
- Often end early
- Basically able to complete the full treatment
- Seldom end early
- Never end early

1. Can your personality help you adapt to your current life situation? [Single choice] *

- Completely unable to adapt
- Average (neither adapt well nor poorly)
- Basically able to adapt
- Adapt quite well
- Adapt very well

1. Can you think objectively and solve hemodialysis-related problems? [Single choice] *

- Never able to
- Seldom able to
- Sometimes able to
- Often able to
- Always able to

1. Can you truly accept the fact that you need long-term hemodialysis treatment? [Single choice] *

- Completely unable to accept
- Seldom able to accept
- Sometimes unable to accept
- Basically able to accept
- Completely able to accept

1. During the interdialysis interval, do you ever forget that you are a hemodialysis patient? [Single choice] *

- Never forget
- Seldom forget
- Sometimes forget
- Often forget
- Completely forget (during the interval)

1. During the interdialysis interval, do you often worry about the next hemodialysis treatment? [Single choice] *

- Always worry
- Mostly worry
- Often worry
- Sometimes worry
- Never worry

1. When getting along with friends, do you feel that you are different from others? [Single choice] *

- Always feel different
- Often feel different
- Sometimes feel different
- Seldom feel different
- Never feel different

1. Can you truly respect and accept yourself as you are now? [Single choice] *

- Never
- Seldom
- Sometimes
- Often
- Always

1. Can you accept the sense of gap (in physical/mental state) before and after hemodialysis treatment? [Single choice] *

- Completely unable to accept
- Seldom able to accept
- Sometimes able to accept
- Basically able to accept
- Completely able to accept

1. Can you recognize your own life value? [Single choice] *

- Completely unable to recognize
- Seldom able to recognize
- Sometimes able to recognize
- Basically able to recognize
- Completely able to recognize

1. Are you full of hope for the future? [Single choice] *

- Never
- Seldom
- Sometimes
- Often
- Always

1. After starting hemodialysis, are you still engaged in your original job? [Single choice] *

- Have completely left the original job
- Sometimes participate in the original job
- Basically participate in the original job but with a significant reduction in workload
- Still engaged in the original job but with a slight reduction in workload
- Still engaged in the original job with no change in workload

1. Can you balance the conflict between work and treatment? [Single choice] *

- Completely unable to
- Seldom able to
- Sometimes able to
- Basically able to
- Always able to

1. After starting treatment, will your unit leaders adjust your work based on your actual situation to reduce your stress? [Single choice] *

- No adjustment at all; feel a lot of stress
- Minimal adjustment; feel quite a lot of stress
- Basic adjustment; feel relatively little stress
- Significant adjustment; feel very little stress
- Complete adjustment; feel no stress

1. Can you choose a career or life mode that suits your current situation? [Single choice] *

- Don’t know how to plan
- Have planned but not implemented
- Have planned and started implementing
- Have planned and basically implemented
- Have completed the plan / think no change is needed

1. Can your financial situation cover your medical expenses? [Single choice] *

- Completely unable to
- Seldom able to
- Basically able to
- Mostly able to
- Completely able to

1. Can medical insurance reduce your financial burden? [Single choice] *

- Completely unable to
- Seldom able to
- Basically able to
- Mostly able to
- Completely able to

1. Do you take the initiative to participate in social activities such as friend gatherings? [Single choice] *

- Never
- Seldom
- Sometimes
- Often
- Always

1. Can you balance the relationship between your illness and marriage, and reduce the impact of the illness on your marriage? [Single choice] *

- Completely unable to
- Seldom able to
- Sometimes able to
- Mostly able to
- Always able to / the illness had no impact on marriage in the first place

1. Does the illness affect your fertility or child-rearing plans? [Single choice] *

- Extremely large impact
- Relatively large impact
- Average impact
- Relatively small impact
- No impact at all

1. Can your family bring you a sense of security and companionship? [Single choice] *

- None at all
- Very little
- Average
- Quite a lot
- Very much

1. Can you accept your current self-role positioning and changes in responsibilities? [Single choice] *

- Completely unable to
- Sometimes able to
- Basically able to
- Mostly able to
- Completely able to

1. Can you find comfort in life from your new life (after starting dialysis)? [Single choice] *

- Never
- Seldom
- Sometimes
- Often
- Always

1. Since starting hemodialysis, have you received practical and effective help or advice? [Single choice] *

- Never
- Seldom
- Sometimes
- Often
- Always

1. Have you become disconnected from society? [Single choice] *

- Completely disconnected
- Mostly disconnected
- Sometimes disconnected
- Seldom feel disconnected
- Not disconnected at all

1. Does the use of online media (such as smartphones and computers) make your life more convenient and efficient? [Single choice] *

- Not at all
- A little
- Average
- Quite a lot
- Very much

1. Do you trust medical staff? [Single choice] *

- Completely distrust
- Sometimes trust
- Basically trust
- Mostly trust
- Always trust

1. Are you satisfied with the medical services provided by the hospital? [Single choice] *

- Always dissatisfied
- Seldom satisfied
- Sometimes satisfied
- Mostly satisfied
- Always very satisfied

1. Does your home living environment make you feel comfortable and safe? [Single choice] *

- No feeling at all
- Seldom feel so
- Sometimes feel so
- Mostly feel so
- Always feel so

1. Do severe weather conditions (such as rain and snow) cause great trouble for you to go to the hospital for treatment? [Single choice] *

- Extremely great trouble
- Relatively great trouble
- Average trouble
- Very little trouble
- No trouble

1. After starting treatment, do you think you have become stronger, more open-minded, and more optimistic? [Single choice] *

- Not at all
- Seldom
- Sometimes
- Often
- Always

1. After starting treatment, have you mastered health knowledge and successful experiences related to your illness? [Single choice] *

- None at all
- A little
- Quite a lot
- A lot
- Very much

1. After starting treatment, have you improved your time utilization efficiency? [Single choice] *

- No improvement; instead, it has decreased
- The same as before
- Improved a little
- Improved quite a lot
- Improved a lot

1. After starting treatment, do you think you have become kinder? [Single choice] *

- No change at all
- A little change
- Quite a lot of change
- Great change
- Very great change

1. After starting treatment, can you manage your emotions and become calmer? [Single choice] *

- Always unable to
- Seldom able to
- Sometimes able to
- Mostly able to
- Always able to

1. After starting treatment, have you adjusted and expanded your interpersonal relationships? [Single choice] *

- No plan to adjust or expand interpersonal relationships at all
- Have a plan to adjust or expand but find it difficult to carry out
- Have started to adjust or expand interpersonal relationships
- Basically completed the adjustment or expansion of interpersonal relationships
- Successfully completed and adapted to the changes in interpersonal relationships

1. After starting treatment, can you perceive the beauty in life? [Single choice] *

- Not at all
- Seldom
- Sometimes
- Often
- Always

1. After starting treatment, do you still persist in your hobbies? [Single choice] *

- None at all
- A little (persistence)
- Average (persistence)
- Quite a lot (persistence)
- A lot (persistence)

1. After starting treatment, can you express your inner emotions in appropriate ways? [Single choice] *

- Always unable to
- Starting to learn how to
- Sometimes able to
- Mostly able to
- Always able to

1. After starting treatment, can you always make your life more fulfilling and interesting? [Single choice] *

- Always unable to
- Starting to learn how to
- Sometimes able to
- Mostly able to
- Always able to
