# Supplementary material for: Assessing Fear of Progression, Stigma, and Psychological Detachment in Hemodialysis Patients: A Structural Equation Modeling Study
Source: Research Square preprint supplement (doi:10.21203/rs.3.rs-7545852/v1), 2025-10-10
Supplement: Supplementary file 2 [file 5b51afb4652e64c1f408b7e2.docx]

# Baseline Questionnaire on the Current Status of Fear of Disease Progression, Stigma, Family Care, and Psychological Detachment in Maintenance Hemodialysis Patients

Dear Sir/Madam,

We send you our best wishes!

We are currently conducting a study titled "Psychological Detachment in Maintenance Hemodialysis (MHD) Patients". A large-sample survey is now needed to explore the influencing factors of psychological detachment in MHD patients. The findings of this study will provide a basis for reducing the negative experiences caused by hemodialysis, safeguarding patients’ mental health, and improving their psychological detachment level and quality of life. We sincerely invite you to participate in this questionnaire survey!

This questionnaire may take 20-30 minutes to complete. Please arrange your time appropriately. Thank you for filling out this questionnaire amid your busy schedule! If you have any questions during the filling process, please feel free to contact us (Contact Person: Liu Cong; Email: 429885794@qq.com).

1. ID Number (e.g., Area 1-1) [Fill in the blank] *
2. Age [Fill in the blank] *
3. Gender [Single choice] *

- Male
- Female

1. Educational Level [Single choice] *

- Primary school or below
- Junior high school
- Senior high school
- Junior college
- Undergraduate
- Postgraduate or above

1. Long-term Residence [Single choice] *

- Urban area
- County seat
- Rural area

1. Marital Status [Single choice] *

- Married
- Unmarried
- Divorced
- Widowed

1. Do you have children? [Single choice] *

- Yes (skip to Question 8)
- No (skip to Question 9)

1. Are your children adults? [Single choice] *

- Yes
- No

1. Your Primary Caregiver [Single choice] *

- Yourself
- Spouse
- Children
- Parents
- Nanny or care worker

1. Current Employment Status [Single choice] *

- Employed
- Retired
- Retired due to illness
- Freelance
- Unemployed
- Out of work

1. Dry Weight (Kg) [Fill in the blank] *
2. Height (m) [Fill in the blank] *
3. Primary Disease [Multiple choices] *

- Chronic glomerulonephritis
- Diabetes mellitus
- Hypertension
- Polycystic kidney disease
- Obstructive nephropathy
- Hyperuricemia
- Improper medication use
- Trauma
- Unknown cause
- Others

1. Dialysis Duration (Years) [Single choice] *

- ≤ 2
- 2 - 5
- 5 - 9
- ≥ 9

1. Hemodialysis Frequency [Single choice] *

- 2 times/week
- 3 times/week
- 5 times/2 weeks

1. Dialysis Mode [Single choice] *

- HD (Hemodialysis)
- HD + HDF (Hemodialysis + Hemodiafiltration)
- HD + HP (Hemodialysis + Hemoperfusion)
- HD + HDF + HP (Hemodialysis + Hemodiafiltration + Hemoperfusion)

1. Type of Blood Anticoagulant Used [Single choice] *

- Low-molecular-weight heparin
- Heparin

1. Type of Vascular Access Currently Used [Single choice] *

- Autologous arteriovenous fistula
- Temporary internal jugular vein catheter
- Temporary femoral vein catheter
- Permanent internal jugular vein catheter
- Permanent femoral vein catheter
- Artificial vascular arteriovenous fistula

1. Do You Have Complications? [Single choice] *

- Yes
- No

1. Number of Comorbidities [Single choice] *

- 0
- 1
- 2
- ≥ 3

1. Type of Basic Social Medical Insurance [Single choice] *

- Urban Employee Basic Medical Insurance + Special Disease Medical Insurance
- Urban Resident Basic Medical Insurance + Special Disease Medical Insurance
- New Rural Cooperative Medical Insurance + Special Disease Medical Insurance
- Public-funded medical care
- Self-funded
- Commercial insurance

1. Monthly Per Capita Household Income (RMB) [Single choice] *

- ≤ 3,000
- 3,000 - 6,000
- 6,000 - 10,000
- 10,000
